# Supplementary material
Source: MDPI journal article supplement (https://www.mdpi.com/2075-5309/11/8/362)
Supplement: s1 [file s1]

Table S1. Overview of EPDs included in study.

| EPD Program        | EPD ID                  | Product category | Reported biogenic carbon (kg CO2/m3) | Calculated biogenic carbon (kg CO2/m3) | Country   | Density of product (kg/m3) | System boundary description | EoL Scenario    |
|--------------------|-------------------------|------------------|--------------------------------------|----------------------------------------|-----------|----------------------------|-----------------------------|-----------------|
| ASTM International | EPD125                  | Glulam           |                                      | 875                                    | Canada    | 544                        | A1-A3                       | Not applicable  |
| ASTM International | EPD124                  | CLT              | 875                                  |                                        | Canada    | 481                        | A1-A3                       | Not applicable  |
| ASTM International | EPD157                  | Glulam           |                                      | 682                                    | Canada    | 449                        | A1-A3                       | Not applicable  |
| B-EPD              | B-EPD n° 210096_001     | Glulam           |                                      | 777                                    | Belgium   | 512.8                      | A1-A3_A4-A5_C1-C2_C3-C4     | Mixed scenario  |
| B-EPD              | B-EPD n° 2000102_002_EN | CLT              |                                      | 749                                    | Belgium   | 470                        | A1-A3_A4-A5_C1-C2_C3-C4     | Mixed scenario  |
| B-EPD              | B-EPD n° 200102_001_EN  | CLT              |                                      | 750                                    | Belgium   | 470                        | A1-A3_A4-A5_C1-C2_C3-C4     | Mixed scenario  |
| BRE                | BREGENEPD000124         | timber           | 712                                  |                                        | UK        | 479                        | A1-A3_A4-A5_C1-C2_C3-C4     | Mixed scenario  |
| BRE                | BREGENEPD000171         | timber           | 1240                                 |                                        | UK        | 585                        | A1-A3_A4                    | Not applicable  |
| ENVIRONDEC         | S-P-01325               | timber           | 715                                  |                                        | Sweden    | 455                        | A1-A3                       | Not applicable  |
| ENVIRONDEC         | S-P-01345               | Glulam           |                                      | 818                                    | Spain     | 525                        | A1-A3                       | Not applicable  |
| ENVIRONDEC         | S-P-01314               | CLT              |                                      | 840                                    | Spain     | 525                        | A1-A3_A4-A5_C1-C2_C3-C4     | Recycling       |
| ENVIRONDEC         | S-P-00565               | Glulam           | 1017                                 |                                        | Australia | 621                        | A1-A3_C3-C4                 | Landfill        |
| ENVIRONDEC         | S-P-00565               | Glulam           | 1017                                 |                                        | Australia | 621                        | A1-A3_C3-C4                 | Landfill        |
| ENVIRONDEC         | S-P-00565               | Glulam           | 1017                                 |                                        | Australia | 621                        | A1-A3_C3-C4                 | Energy recovery |
| ENVIRONDEC         | S-P-00565               | Glulam           | 1017                                 |                                        | Australia | 621                        | A1-A3_C3-C4                 | Reuse           |
| ENVIRONDEC         | S-P-00565               | Glulam           | 1017                                 |                                        | Australia | 621                        | A1-A3_C3-C4                 | Recycling       |
| ENVIRONDEC         | S-P-00565               | Glulam           | 1118                                 |                                        | Australia | 674                        | A1-A3_C3-C4                 | Landfill        |
| ENVIRONDEC         | S-P-00565               | Glulam           | 1118                                 |                                        | Australia | 674                        | A1-A3_C3-C4                 | Landfill        |
| ENVIRONDEC         | S-P-00565               | Glulam           | 1118                                 |                                        | Australia | 674                        | A1-A3_C3-C4                 | Energy recovery |
| ENVIRONDEC         | S-P-00565               | Glulam           | 1118                                 |                                        | Australia | 674                        | A1-A3_C3-C4                 | Reuse           |
| ENVIRONDEC         | S-P-00565               | Glulam           | 1118                                 |                                        | Australia | 674                        | A1-A3_C3-C4                 | Recycling       |
| ENVIRONDEC         | S-P-00561               | timber           | 1220                                 |                                        | Australia | 735                        | A1-A3_C4                    | Landfill        |
| ENVIRONDEC         | S-P-00561               | timber           | 1220                                 |                                        | Australia | 735                        | A1-A3_C4                    | Landfill        |
| ENVIRONDEC         | S-P-00561               | timber           | 1220                                 |                                        | Australia | 735                        | A1-A3_C4                    | Energy recovery |
| ENVIRONDEC         | S-P-00561               | timber           | 1220                                 |                                        | Australia | 735                        | A1-A3_C4                    | Recycling       |
| ENVIRONDEC         | S-P-00561               | timber           | 1220                                 |                                        | Australia | 735                        | A1-A3_C4                    | Reuse           |
| ENVIRONDEC         | S-P-00561               | timber           | 1220                                 |                                        | Australia | 735                        | A1-A3_C4                    | Landfill        |
| ENVIRONDEC         | S-P-00561               | timber           | 1220                                 |                                        | Australia | 735                        | A1-A3_C4                    | Landfill        |
| ENVIRONDEC         | S-P-00561               | timber           | 1220                                 |                                        | Australia | 735                        | A1-A3_C4                    | Energy recovery |
| ENVIRONDEC         | S-P-00561               | timber           | 1220                                 |                                        | Australia | 735                        | A1-A3_C4                    | Recycling       |
| ENVIRONDEC         | S-P-00561               | timber           | 1220                                 |                                        | Australia | 735                        | A1-A3_C4                    | Reuse           |
| ENVIRONDEC         | S-P-00561               | timber           | 1220                                 |                                        | Australia | 768                        | A1-A3_C4                    | Landfill        |
| ENVIRONDEC         | S-P-00561               | timber           | 1220                                 |                                        | Australia | 768                        | A1-A3_C4                    | Landfill        |
| ENVIRONDEC         | S-P-00561               | timber           | 1220                                 |                                        | Australia | 768                        | A1-A3_C4                    | Energy recovery |
| ENVIRONDEC         | S-P-00561               | timber           | 1220                                 |                                        | Australia | 768                        | A1-A3_C4                    | Recycling       |
| ENVIRONDEC         | S-P-00561               | timber           | 1220                                 |                                        | Australia | 768                        | A1-A3_C4                    | Reuse           |
| ENVIRONDEC         | S-P-00560               | timber           | 900                                  |                                        | Australia | 551                        | A1-A3_C4                    | Landfill        |
| ENVIRONDEC         | S-P-00560               | timber           | 900                                  |                                        | Australia | 551                        | A1-A3_C4                    | Landfill        |
| ENVIRONDEC         | S-P-00560               | timber           | 900                                  |                                        | Australia | 551                        | A1-A3_C4                    | Energy recovery |
| ENVIRONDEC         | S-P-00560               | timber           | 900                                  |                                        | Australia | 551                        | A1-A3_C4                    | Recycling       |
| ENVIRONDEC         | S-P-00560               | timber           | 900                                  |                                        | Australia | 551                        | A1-A3_C4                    | Landfill        |
| ENVIRONDEC         | S-P-00560               | timber           | 900                                  |                                        | Australia | 551                        | A1-A3_C4                    | Landfill        |
| ENVIRONDEC         | S-P-00560               | timber           | 900                                  |                                        | Australia | 551                        | A1-A3_C4                    | Energy recovery |
| ENVIRONDEC         | S-P-00560               | timber           | 900                                  |                                        | Australia | 551                        | A1-A3_C4                    | Recycling       |
| ENVIRONDEC         | S-P-02537               | timber           | 715                                  |                                        | Sweden    | 455                        | A1-A3_C1-C2_C3-C4           | Energy recovery |
| ENVIRONDEC         | S-P-02153               | timber           | 717                                  |                                        | Finland   | 450                        | A1-A3_A5_C1-C2_C3-C4        | Reuse           |
| ENVIRONDEC         | S-P-02153               | timber           | 717                                  |                                        | Finland   | 450                        | A1-A3_A5_C1-C2_C3-C4        | Recycling       |
| ENVIRONDEC         | S-P-02153               | timber           | 717                                  |                                        | Finland   | 450                        | A1-A3_A5_C1-C2_C3-C4        | Energy recovery |
| ENVIRONDEC         | S-P-02153               | timber           | 717                                  |                                        | Finland   | 450                        | A1-A3_A5_C1-C2_C3-C4        | Landfill        |
| ENVIRONDEC         | S-P-02033               | CLT              | 762                                  |                                        | Finland   | 470                        | A1-A3_A4-A5_C1-C2_C3-C4     | Reuse           |
| ENVIRONDEC         | S-P-02033               | CLT              | 762                                  |                                        | Finland   | 470                        | A1-A3_A4-A5_C1-C2_C3-C4     | Recycling       |
| ENVIRONDEC         | S-P-02033               | CLT              | 762                                  |                                        | Finland   | 470                        | A1-A3_A4-A5_C1-C2_C3-C4     | Energy recovery |
| ENVIRONDEC         | S-P-02033               | CLT              | 762                                  |                                        | Finland   | 470                        | A1-A3_A4-A5_C1-C2_C3-C4     | Landfill        |
| ENVIRONDEC         | S-P-01408               | CLT              | 520                                  |                                        | Italy     | 400                        | A1-A3                       | Not applicable  |
| ENVIRONDEC         | S-P-02150               | timber           | 733                                  |                                        | Finland   | 460                        | A1-A3_C1-C2_C3-C4           | Reuse           |
| ENVIRONDEC         | S-P-02150               | timber           | 733                                  |                                        | Finland   | 460                        | A1-A3_C1-C2_C3-C4           | Recycling       |
| ENVIRONDEC         | S-P-02150               | timber           | 733                                  |                                        | Finland   | 460                        | A1-A3_C1-C2_C3-C4           | Energy recovery |
| ENVIRONDEC         | S-P-02150               | timber           | 733                                  |                                        | Finland   | 460                        | A1-A3_C1-C2_C3-C4           | Landfill        |
| ENVIRONDEC         | S-P-01732               | LVL              | 804                                  |                                        | Finland   | 510                        | A1-A3_A4-A5_C1-C2_C3-C4     | Reuse           |
| ENVIRONDEC         | S-P-01732               | LVL              | 804                                  |                                        | Finland   | 510                        | A1-A3_A4-A5_C1-C2_C3-C4     | Recycling       |
| ENVIRONDEC         | S-P-01732               | LVL              | 804                                  |                                        | Finland   | 510                        | A1-A3_A4-A5_C1-C2_C3-C4     | Energy recovery |
| ENVIRONDEC         | S-P-01732               | LVL              | 804                                  |                                        | Finland   | 510                        | A1-A3_A4-A5_C1-C2_C3-C4     | Landfill        |
| ENVIRONDEC         | S-P-01731               | LVL              | 804                                  |                                        | Finland   | 510                        | A1-A3_A4-A5_C1-C2_C3-C4     | Reuse           |
| ENVIRONDEC         | S-P-01731               | LVL              | 804                                  |                                        | Finland   | 510                        | A1-A3_A4-A5_C1-C2_C3-C4     | Recycling       |

|             |                          |        |     |     |             |       |                         |                 |
|-------------|--------------------------|--------|-----|-----|-------------|-------|-------------------------|-----------------|
| ENVIRONDEC  | S-P-01731                | LVL    | 804 |     | Finland     | 510   | A1-A3_A4-A5_C1-C2_C3-C4 | Energy recovery |
| ENVIRONDEC  | S-P-01731                | LVL    | 804 |     | Finland     | 510   | A1-A3_A4-A5_C1-C2_C3-C4 | Landfill        |
| ENVIRONDEC  | S-P-01730                | LVL    | 804 |     | Finland     | 510   | A1-A3_A4-A5_C1-C2_C3-C4 | Reuse           |
| ENVIRONDEC  | S-P-01730                | LVL    | 804 |     | Finland     | 510   | A1-A3_A4-A5_C1-C2_C3-C4 | Recycling       |
| ENVIRONDEC  | S-P-01730                | LVL    | 804 |     | Finland     | 510   | A1-A3_A4-A5_C1-C2_C3-C4 | Energy recovery |
| ENVIRONDEC  | S-P-01730                | LVL    | 804 |     | Finland     | 510   | A1-A3_A4-A5_C1-C2_C3-C4 | Landfill        |
| ENVIRONDEC  | S-P-00997                | timber |     | 791 | New Zealan  | 488   | A1-A3_C3-C4             | Landfill        |
| ENVIRONDEC  | S-P-00997                | timber |     | 791 | New Zealan  | 488   | A1-A3_C3-C4             | Energy recovery |
| ENVIRONDEC  | S-P-00997                | timber |     | 791 | New Zealan  | 488   | A1-A3_C3-C4             | Reuse           |
| ENVIRONDEC  | S-P-00997                | timber |     | 791 | New Zealan  | 488   | A1-A3_C3-C4             | Recycling       |
| ENVIRONDEC  | S-P-00997                | timber |     | 788 | New Zealan  | 486   | A1-A3_C3-C4             | Landfill        |
| ENVIRONDEC  | S-P-00997                | timber |     | 788 | New Zealan  | 486   | A1-A3_C3-C4             | Energy recovery |
| ENVIRONDEC  | S-P-00997                | timber |     | 788 | New Zealan  | 486   | A1-A3_C3-C4             | Reuse           |
| ENVIRONDEC  | S-P-00997                | timber |     | 788 | New Zealan  | 486   | A1-A3_C3-C4             | Recycling       |
| ENVIRONDEC  | S-P-00997                | Glulam |     | 798 | New Zealan  | 491   | A1-A3_C3-C4             | Landfill        |
| ENVIRONDEC  | S-P-00997                | Glulam |     | 798 | New Zealan  | 491   | A1-A3_C3-C4             | Energy recovery |
| ENVIRONDEC  | S-P-00997                | Glulam |     | 798 | New Zealan  | 491   | A1-A3_C3-C4             | Reuse           |
| ENVIRONDEC  | S-P-00997                | Glulam |     | 798 | New Zealan  | 491   | A1-A3_C3-C4             | Recycling       |
| ENVIRONDEC  | S-P-00997                | CLT    |     | 807 | New Zealan  | 500   | A1-A3_C3-C4             | Landfill        |
| ENVIRONDEC  | S-P-00997                | CLT    |     | 807 | New Zealan  | 500   | A1-A3_C3-C4             | Energy recovery |
| ENVIRONDEC  | S-P-00997                | CLT    |     | 807 | New Zealan  | 500   | A1-A3_C3-C4             | Reuse           |
| ENVIRONDEC  | S-P-00997                | CLT    |     | 807 | New Zealan  | 500   | A1-A3_C3-C4             | Recycling       |
| ENVIRONDEC  | S-P-02326                | CLT    | 781 |     | Australia   | 480   | A1-A3_A4_C3-C4          | Landfill        |
| ENVIRONDEC  | S-P-02326                | CLT    | 781 |     | Australia   | 480   | A1-A3_A4_C3-C4          | Landfill        |
| ENVIRONDEC  | S-P-02326                | CLT    | 781 |     | Australia   | 480   | A1-A3_A4_C3-C4          | Energy recovery |
| ENVIRONDEC  | S-P-02326                | CLT    | 781 |     | Australia   | 480   | A1-A3_A4_C3-C4          | Reuse           |
| ENVIRONDEC  | S-P-02326                | CLT    | 781 |     | Australia   | 480   | A1-A3_A4_C3-C4          | Recycling       |
| ENVIRONDEC  | S-P-01714                | timber |     | 837 | Basque      | 525   | A1-A3                   | Not applicable  |
| EPD Danmark | MD-20001-EN              | timber |     | 767 | Denmark     | 644   | A1-A3_C2_C3-C4          | Energy recovery |
| EPD Danmark | MD-20001-EN              | timber |     | 767 | Denmark     | 644   | A1-A3_C2_C3-C4          | Recycling       |
| EPD Danmark | MD-20002-EN              | timber |     | 702 | Denmark     | 456   | A1-A3_C2_C3-C4          | Energy recovery |
| EPD Danmark | MD-20002-EN              | timber |     | 702 | Denmark     | 456   | A1-A3_C2_C3-C4          | Recycling       |
| EPD Danmark | MD-20003-EN              | timber |     | 806 | Denmark     | 536   | A1-A3_C2_C3-C4          | Energy recovery |
| EPD Danmark | MD-20003-EN              | timber |     | 806 | Denmark     | 536   | A1-A3_C2_C3-C4          | Recycling       |
| EPD Danmark | MD-20004-EN              | timber |     | 702 | Denmark     | 456   | A1-A3_C2_C3-C4          | Energy recovery |
| EPD Danmark | MD-20004-EN              | timber |     | 702 | Denmark     | 456   | A1-A3_C2_C3-C4          | Recycling       |
| EPD Danmark | MD-20005-EN              | Glulam |     | 788 | Denmark     | 500   | A1-A3_C2_C3-C4          | Energy recovery |
| EPD Danmark | MD-20005-EN              | Glulam |     | 788 | Denmark     | 500   | A1-A3_C2_C3-C4          | Recycling       |
| EPD Danmark | MD-20007-EN              | CLT    |     | 750 | Denmark     | 470   | A1-A3_C2_C3-C4          | Energy recovery |
| EPD Danmark | MD-20007-EN              | CLT    |     | 750 | Denmark     | 470   | A1-A3_C2_C3-C4          | Recycling       |
| EPD -NORWAY | NEPD-2587-1314-EN        | CLT    |     | 702 | Sweden      | 430   | A1-A3_A4-A5_C1-C2_C3    | Energy recovery |
| EPD -NORWAY | NEPD-345-236-NO          | CLT    | 718 |     | Sweden      | 430   | A1-A3                   | Not applicable  |
| EPD -NORWAY | NEPD-346-236-NO          | Glulam | 718 |     | Sweden      | 430   | A1-A3                   | Not applicable  |
| EPD -NORWAY | NEPD-395-279-NO          | timber |     |     | Norway      | 460   | A1-A3_A4-A5_C1-C2_C3-C4 | Recycling       |
| EPD -NORWAY | NEPD-456-318-EN          | Glulam | 718 |     | Sweden      | 430   | A1-A3_A4                | Not applicable  |
| EPD -NORWAY | NEPD-1269-410-EN         | CLT    | 708 |     | Latvia      | 420   | A1-A3_A4-A5_C1-C2_C3-C4 | Energy recovery |
| EPD -NORWAY | NEPD-1576-605-NO         | Glulam | 688 |     | Norway      | 425   | A1-A3_A4-A5_C1-C2_C3-C4 | Energy recovery |
| EPD -NORWAY | NEPD-1577-605-NO         | Glulam | 688 |     | Norway      | 426   | A1-A3_A4-A5_C1-C2_C3-C4 | Energy recovery |
| EPD -NORWAY | NEPD-1662-655-EN         | Glulam | 704 |     | Sweden      | 434   | A1-A3_A4                | Energy recovery |
| EPD -NORWAY | NEPD-2531-1274-NO        | Glulam | 770 |     | Norway      | 480   | A1-A3_A4-A5_C1-C2_C3-C4 | Energy recovery |
| EPD -NORWAY | NEPD-2042-902-NO         | CLT    | 687 |     | Norway      | 425   | A1-A3_A4-A5_C1-C2_C3-C4 | Energy recovery |
| EPD -NORWAY | NEPD-2547-1284-NO        | timber | 800 |     | Norway      | 509   | A1-A3_A4-A5_C1-C2_C3-C4 | Energy recovery |
| EPD -NORWAY | NEPD-1937-857-NO         | timber | 687 |     | Norway      | 439.8 | A1-A3_A4-A5_C1-C2_C3-C4 | Energy recovery |
| EPD -NORWAY | NEPD-2546-1284-NO        | timber | 800 |     | Norway      | 509   | A1-A3_A4-A5_C1-C2_C3-C4 | Energy recovery |
| IBU         | EPD-RUB-20180060-IBB1-EN | CLT    |     | 744 | Italy       | 461   | A1-A3_C3                | Energy recovery |
| IBU         | EPD-SHL-20180035-IBG1-EN | CLT    | 755 |     | Germany     | 470   | A1-A3_A5_C2_C3          | Energy recovery |
| IBU         | EPD-SHL-20180026-IBG1-EN | Glulam | 771 |     | Germany     | 476   | A1-A3_A5_C2_C3          | Energy recovery |
| IBU         | EPD-SHL-20180027-IBG1-EN | Glulam | 774 |     | Germany     | 483   | A1-A3_A5_C2_C3          | Energy recovery |
| IBU         | EPD-RUB-20180058-IBB1-EN | Glulam |     | 757 | Austria     | 464   | A1-A3_C3                | Energy recovery |
| IBU         | EPD-RUB-20180062-IBB1-EN | Glulam |     | 808 | Italy       | 495   | A1-A3_C3                | Energy recovery |
| IBU         | EPD-EGG-20140247-IBA2-EN | timber |     | 790 | Germany     | 507   | A1-A3                   | Not applicable  |
| IBU         | EPD-EGG-20140246-IBA2-EN | timber |     |     | Germany     | 740   | A1-A3                   | Not applicable  |
| IBU         | EPD-EGG-20140248-IBA2-EN | timber |     | 762 | Germany     | 489   | A1-A3                   | Not applicable  |
| IBU         | EPD-SLH-20180066-IBC1-EN | Glulam |     | 688 | Switzerland | 424   | A1-A3_A4-A5_C2_C3-C4    | Not specified   |
| IBU         | EPD-STE-20190005-IBC1-EN | LVL    | 881 |     | Poland      | 550   | A1-A3_A5_C2_C3          | Energy recovery |
| IBU         | EPD-RUB-20180059-IBB1-EN | timber |     | 772 | Austria     | 465   | A1-A3_C3                | Energy recovery |
| IBU         | EPD-BBS-20190164         | Glulam | 786 |     | Austria     | 459.2 | A1-A3_A5_C2_C3          | Energy recovery |
| IBU         | EPD-KLH-20190027         | CLT    | 790 |     | Austria     | 480   | A1-A3_A4-A5_C1-C2_C3-C4 | Energy recovery |
| IBU         | EPD-BBS-20190021         | CLT    | 901 |     | Austria     | 471   | A1-A3_A5_C2_C3          | Energy recovery |
| INIES       | n° 7-1765:2018           | timber | 691 |     | France      | 451   | A1-A3_A4-A5_C1-C2_C3-C4 | Mixed scenario  |

|                |                          |        |     |     |             |       |                         |                 |
|----------------|--------------------------|--------|-----|-----|-------------|-------|-------------------------|-----------------|
| INIES          | n° 7-1764:2018           | timber | 686 |     | France      | 457.8 | A1-A3_A4-A5_C1-C2_C3-C4 | Mixed scenario  |
| INIES          | n° 7-1766:2018           | Glulam | 836 |     | France      | 535.9 | A1-A3_A4-A5_C1-C2_C3-C4 | Mixed scenario  |
| INIES          | FDES                     | timber | 686 |     | France      | 488   | A1-A3_A4-A5_C1-C2_C3-C4 | Mixed scenario  |
| INIES          | 1-32:2019                | Glulam | 811 |     | France      | 454.4 | A1-A3_A4-A5_C1-C2_C3-C4 | Mixed scenario  |
| INIES          | 1-3:2019                 | timber | 741 |     | France      | 493.2 | A1-A3_A4-A5_C1-C2_C3-C4 | Mixed scenario  |
| INIES          | 1-4:2019                 | timber | 740 |     | France      | 490   | A1-A3_A4-A5_C2_C3-C4    | Mixed scenario  |
| INIES          | 1-12:2019                | Glulam | 725 |     | France      | 485.7 | A1-A3_A4-A5_C1-C2_C3-C4 | Mixed scenario  |
| INIES          | 1-11:2019                | Glulam | 725 |     | France      | 485.7 | A1-A3_A4-A5_C1-C2_C3-C4 | Mixed scenario  |
| INIES          | 3-210:2020               | Glulam | 880 |     | Canada      | 560   | A1-A3_A4-A5_C1-C2_C3-C4 | Mixed scenario  |
| INIES          | 1-2:2020                 | Glulam | 716 |     | France      | 443.5 | A1-A3_A4-A5_C1-C2_C3-C4 | Mixed scenario  |
| MRPI           | 0001277 (1.1.00134.2020) | CLT    | 759 |     | Netherlands | 470   | A1-A3_A4-A5_C2_C3-C4    | Energy recovery |
| MRPI           | 0001278 (1.1.00135.2020) | CLT    | 759 |     | Netherlands | 470   | A1-A3_A4-A5_C2_C3-C4    | Energy recovery |
| RTS            | RTS_27_19                | timber |     | 713 | Finland     | 474   | A1-A3_A4_C1-C2_C3-C4    | Energy recovery |
| RTS            | RTS_82_20                | timber |     | 748 | Finland     | 478.5 | A1-A3_A4_C1-C2_C3-C4    | Energy recovery |
| RTS            | RTS_110_21               | CLT    |     | 800 | Finland     | 485   | A1-A3_A4-A5_C1-C2_C3-C4 | Energy recovery |
| UL Environment | 4788424634.105.1         | LVL    | 998 |     | North Amer  | 548   | A1-A3                   | Not applicable  |
| UL Environment | 4788424634.104.1         | Glulam | 977 |     | North Amer  | 548   | A1-A3                   | Not applicable  |
| UL Environment | 4788424634.102.1         | timber | 844 |     | North Amer  | 460   | A1-A3                   | Not applicable  |
